# Supplementary material for: An increase in reactive oxygen species underlies neonatal cerebellum repair
Source: PubMed Central journal article supplement — bioRxiv. 2025 Feb 18:2024.10.14.618368. Originally published 2024 Oct 17. Preprint. [Version 2] doi: 10.1101/2024.10.14.618368 (PMC11507802; doi:10.1101/2024.10.14.618368), 2025-02-18
Supplement: NIHPP2024.10.14.618368v1-supplement-1.pdf [file NIHPP2024.10.14.618368v1-supplement-1.pdf]

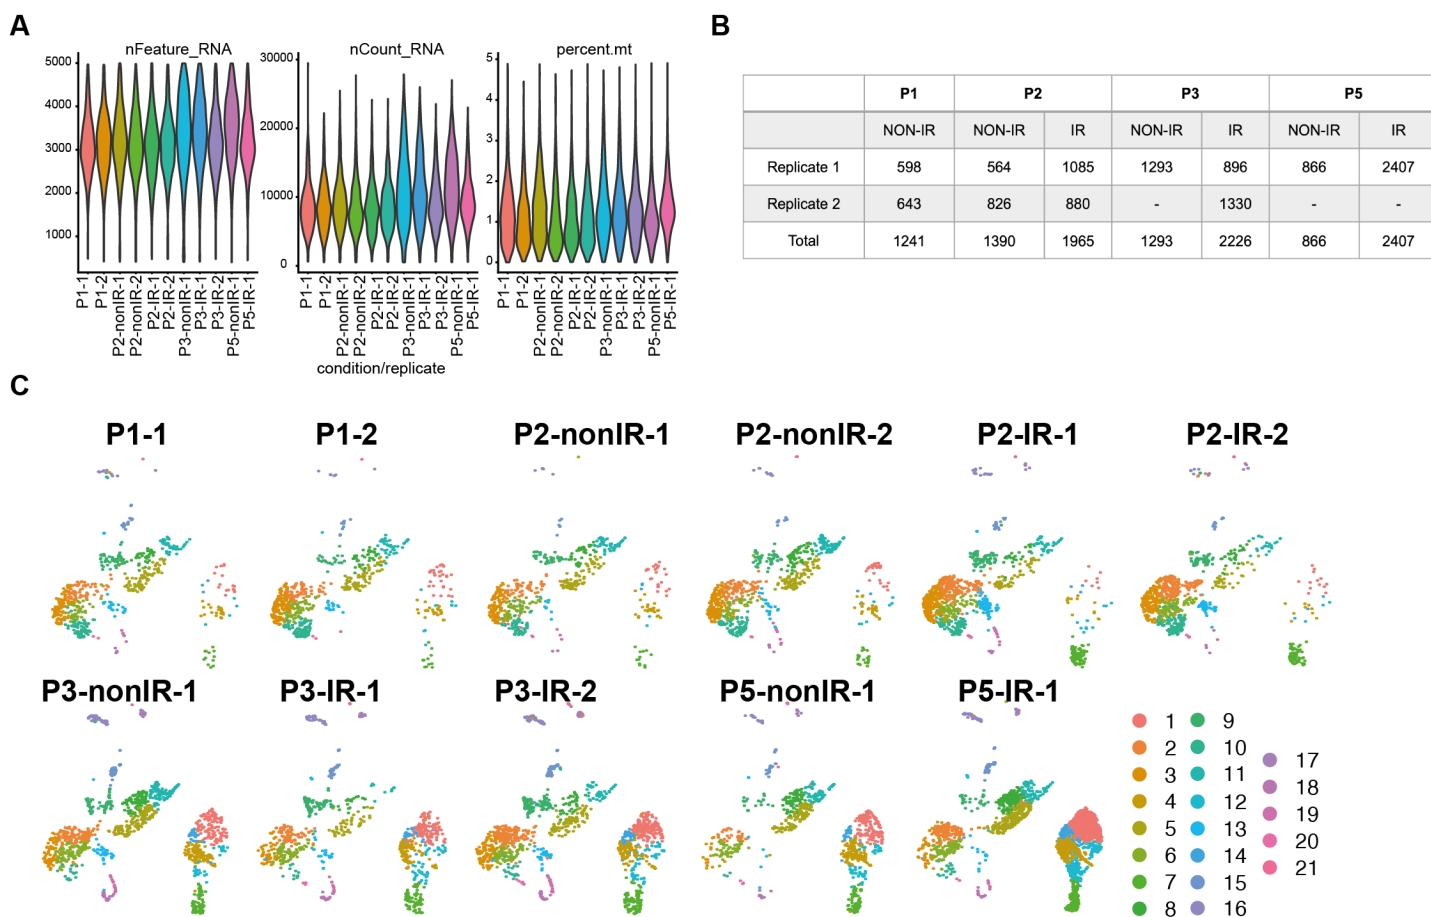

**Supplementary Figure 1. scRNA-seq quality metrics and number of cells sequenced in each condition and biological replicate.**

**(A)** Violin plots showing the number of features, RNA and percent mitochondrial RNA count across the biological replicates of the scRNA-seq data set after filtering the bad quality cells (cells were filtered out where number of detected genes was  $\leq 1500$ , the number of detected transcripts was  $\geq 40,000$  and mitochondrial gene percentage  $\geq 5\%$ ).

**(B)** Number of cells from each replicate and condition used for downstream analyses after filtering.

**(C)** UMAPs showing the distribution of cells across different clusters based on the samples.

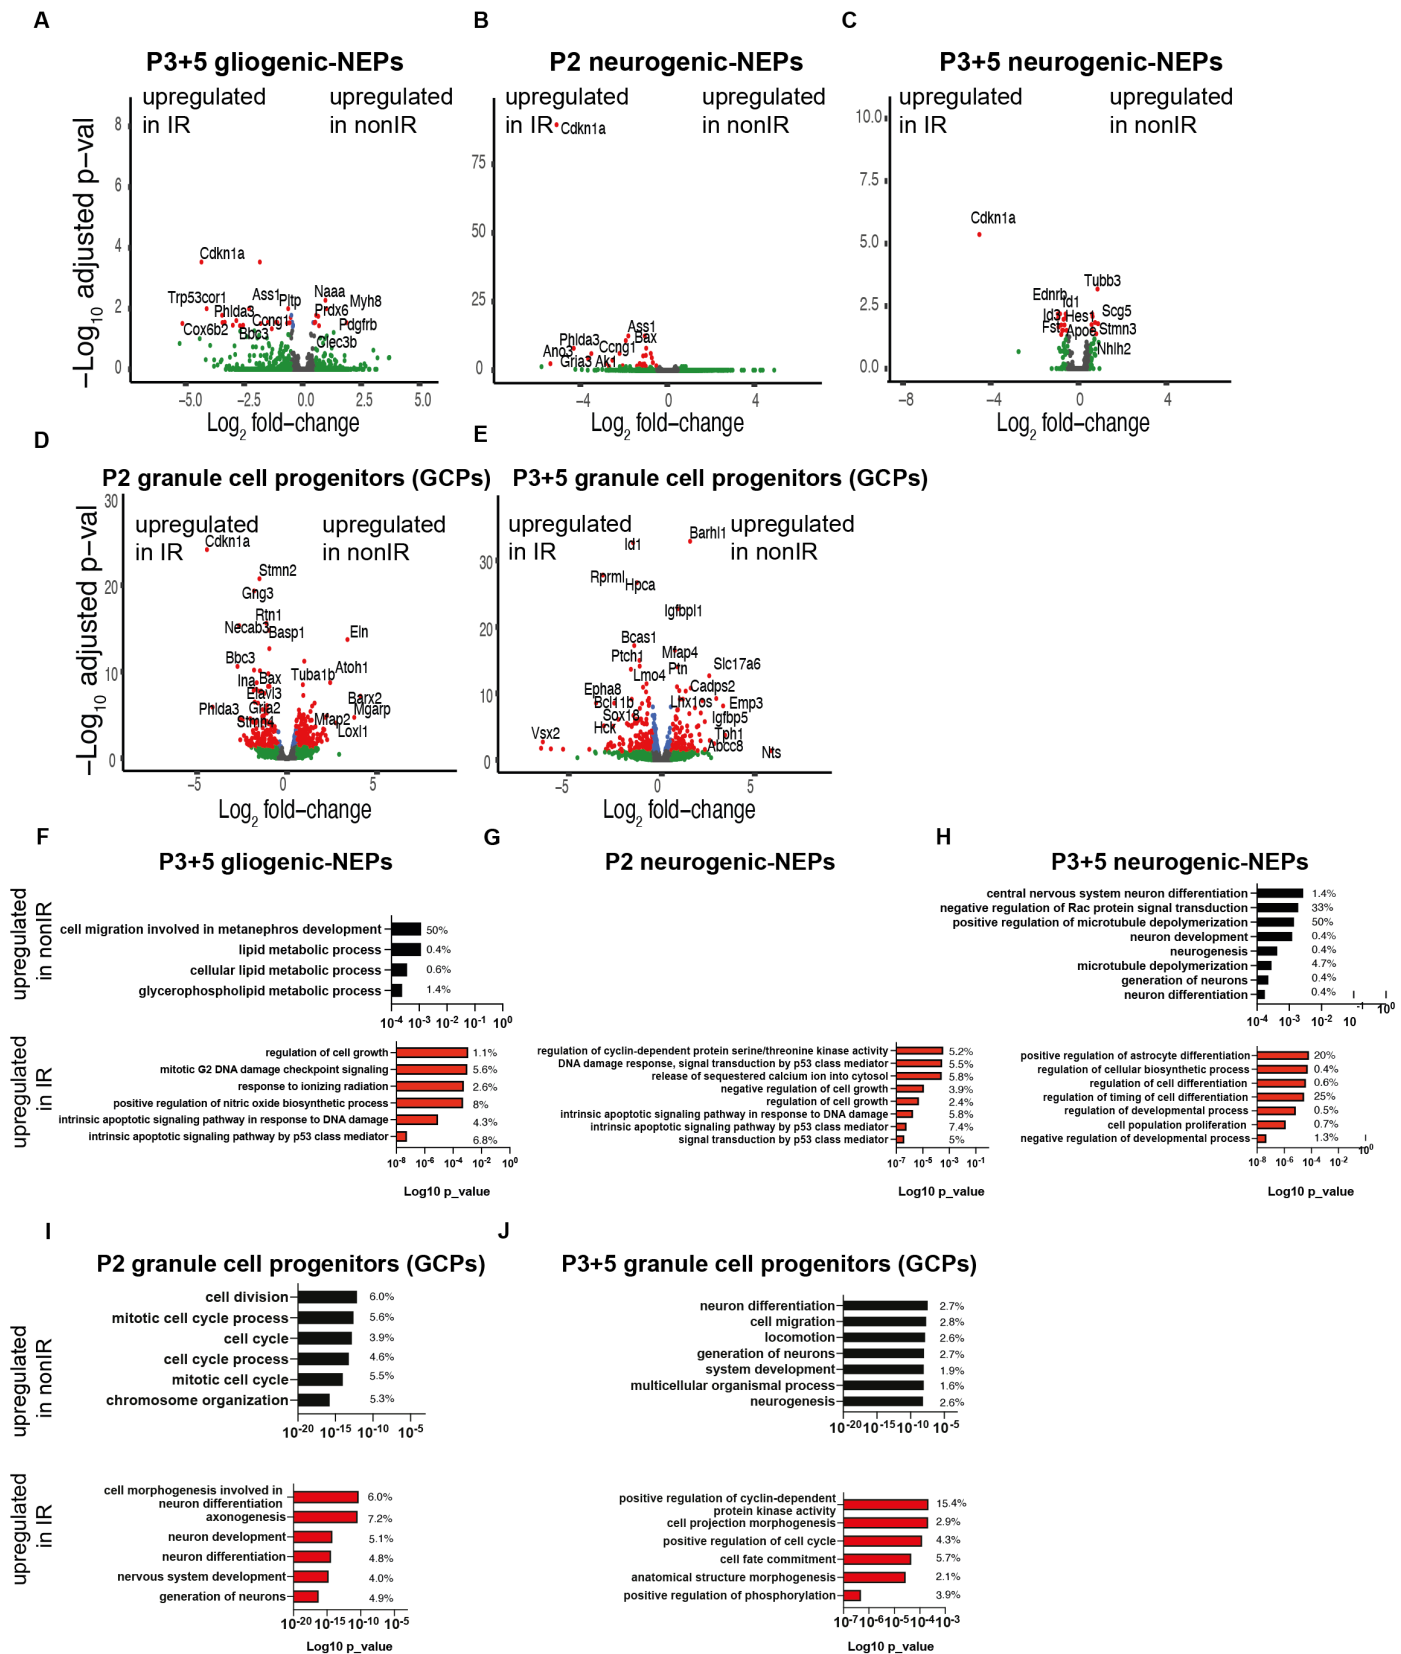

**Supplementary Figure 2: Injury induces distinct transcriptional changes in NEP subtypes and GCPs during adaptive reprogramming.**

(A-E) Volcano plot showing differentially expressed genes in the P3+5 gliogenic-NEPs (A), P2 and P3+5 neurogenic NEPs (B, C) and P2 or P3+5 GCPs (D, E) (red: adjusted p-value≤0.05, log<sub>2</sub>fold-change=1, Table S2).

(F-J) Top GO terms associated with differentially expressed genes in the P3+5 gliogenic-NEPs (F), P2 or P3+5 neurogenic NEPs (G, H) and P2 or P3+5 GCPs (I, J) that were either upregulated in nonIR (top panel) or IR (bottom panel) (p-value≤0.05).

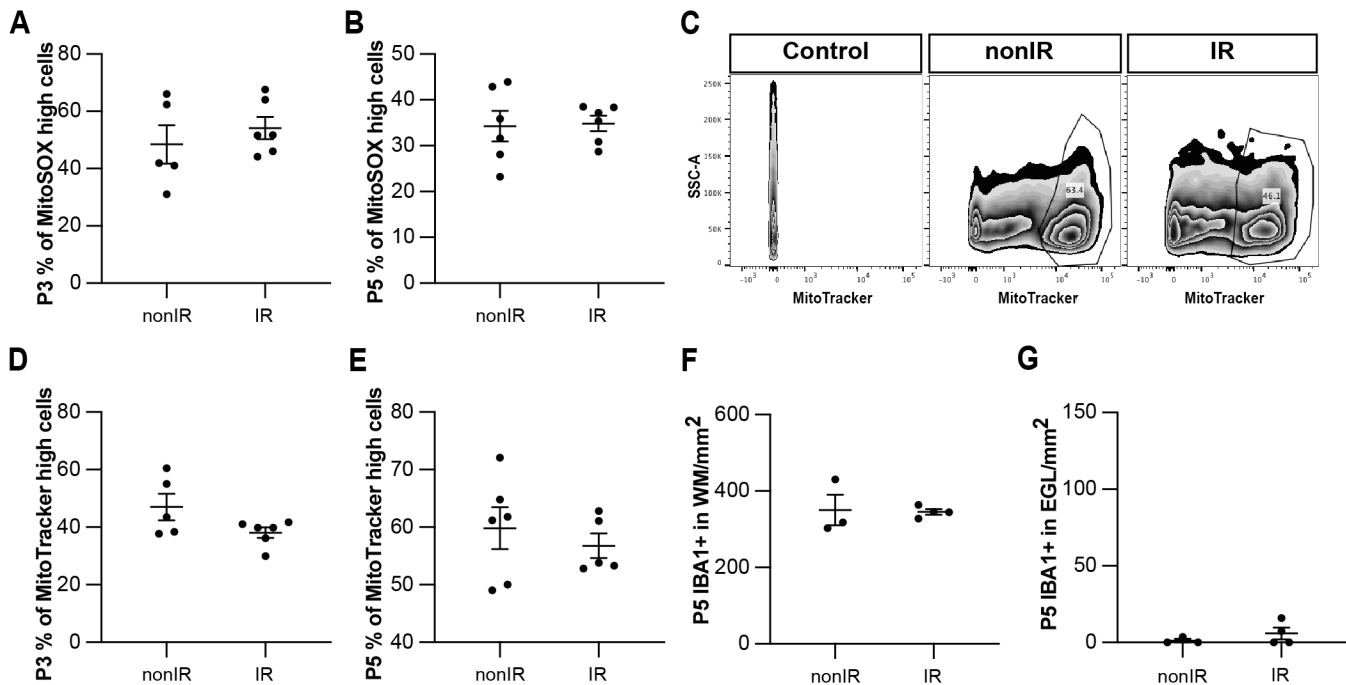

**Supplementary Figure 3: Irradiation of cerebella at P1 results in increased superoxide production and cell death and recruitment of microglia to the EGL that peaks at 24h.**

**(A, B)** Quantification of high MitoSOX expression in nonIR and IR cerebella at P3 (A) and P5 (B).

**(C)** Examples of flow cytometry analysis of mitochondria at P2 from nonIR and IR cerebella using MitoTracker dye. Gating determined the top 90% MitoTracker signal (MitoTracker high cells).

**(D, E)** Quantification of MitoTracker high expression in nonIR and IR cerebella at P3 (D) and P5 (E).

**(F)** Quantification of IBA1+ cell density in the WM at P5 in lobules 3-5 of nonIR and IR mice.

**(G)** Quantification of IBA1+ cell density in the EGL at P5 in lobules 3-5 of nonIR and IR mice.

EGL, External granular layer; WM, White matter; P, postnatal day; nonIR, non-irradiated; IR, irradiated. All statistical significance was determined using an unpaired t-test and data are represented as mean  $\pm$  SEM.

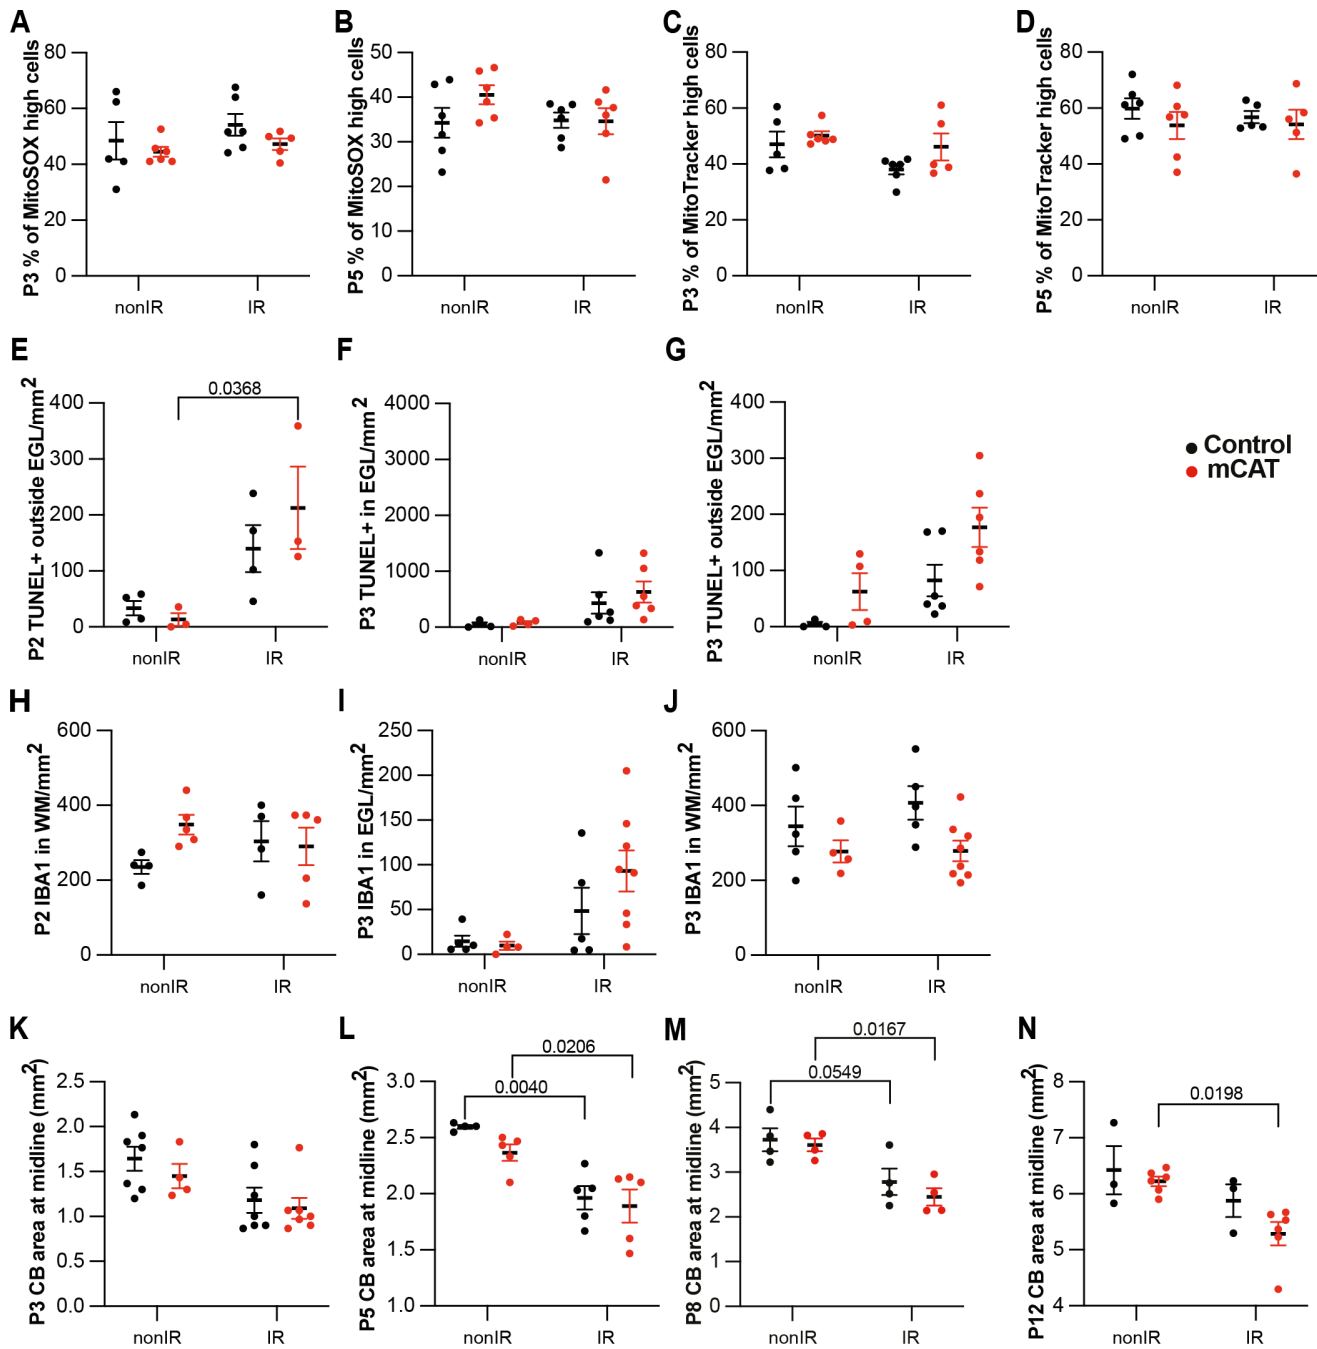

**Supplementary Figure 4: Reduction of ROS impairs adaptive reprogramming and cerebellar repair.**

(A, B) Quantification of high MitoSOX expression at P3 (A) and P5 (B) in control and *mCAT*<sup>+/+</sup> cerebella, with and without irradiation at P1.

(C, D) Quantification of MitoTracker high expression at P3 (C) and P5 (D) in control and *mCAT*<sup>+/+</sup> cerebella, with and without irradiation at P1.

(E-G) Quantification of TUNEL+ cell density outside EGL at P2 (Two-way ANOVA,  $F_{(1,10)}=14.20$ ,  $p=0.0037$ ) (E), at P3 (G), and in the EGL at P3 (F) in lobules 3-5 of nonIR and IR mice.

(H-J) Quantification of IBA1+ cell density in WM at P2 (H), at P3 (J), and in the EGL at P3 (I) in lobules 3-5 of nonIR and IR mice.

(K-N) Quantification of cerebellar midsagittal section area in controls and *mCAT*<sup>+/+</sup> nonIR and IR mice at P3 (K), P5 (Two-way ANOVA,  $F_{(1,15)}=28.52$ ,  $p<0.001$ ) (L), P8 (Two-way ANOVA,  $F_{(1,12)}=21.21$ ,  $p=0.0006$ ) (M) and P12 (Two-way ANOVA,  $F_{(1,14)}=9.682$ ,  $p=0.0077$ ) (N).

EGL, External granular layer; WM, White matter; P, postnatal day; nonIR, non-irradiated; IR, irradiated. Significant *Tukey's post hoc* multiple comparison tests are shown in the figures and data are represented as mean  $\pm$  SEM.

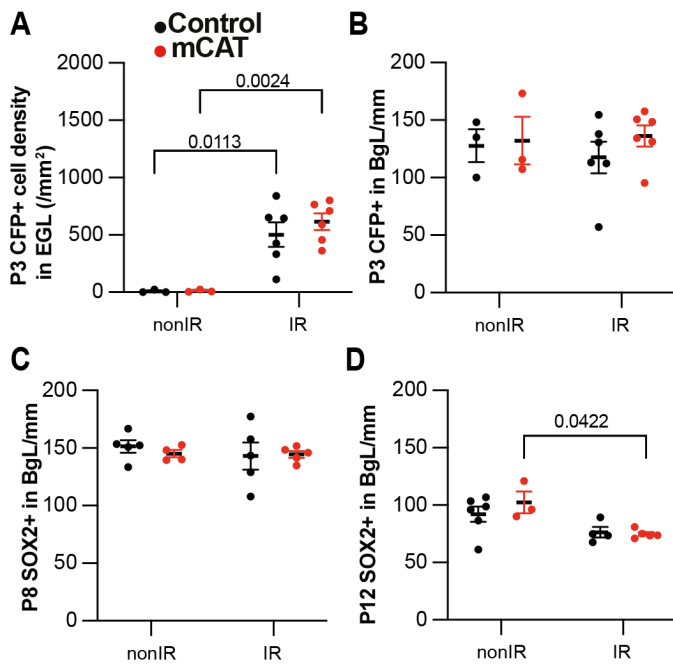

### Supplementary Figure 5: Reduced ROS impairs expansion of BgL-NEPs and their migration to the EGL after injury.

(A) Quantification of CFP+ cell density in the EGL at P3 in *Nes-Cfp/+* control or *Nes-Cfp/+ mCAT* mutant nonIR and IR mice. (Two-way ANOVA,  $F_{(1,14)}=33.77$ ,  $p<0.0001$ ).

(B) Quantification of CFP+ cell normalized on BgL length at P5 in *Nes-Cfp/+* control or *Nes-Cfp/+ mCAT* mutant nonIR and IR mice.

(C, D) Quantification of SOX2+ NEP cell density on BgL length at P8 (C) and P12 (Two-way ANOVA,  $F_{(1,12)}=12.50$ ,  $p=0.0033$ ) (D) in control or *mCAT* mutant nonIR and IR mice.

EGL, External granular layer; BgL, Bergmann glia Layer; P, postnatal day; nonIR, non-irradiated; IR, irradiated. Significant *Tukey's post hoc* multiple comparison tests are shown in the figures and data are represented as mean  $\pm$  SEM.

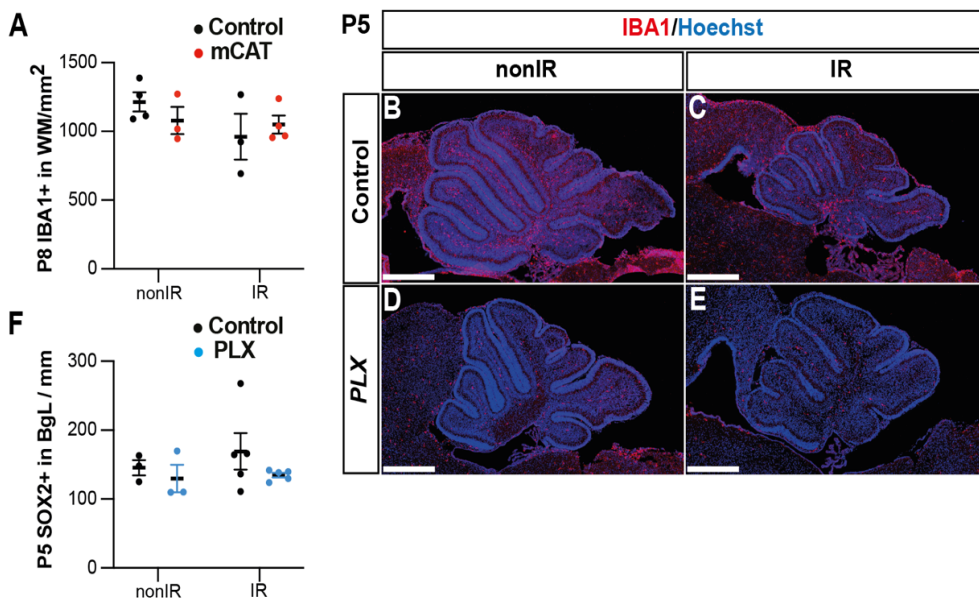

### Supplementary Figure 6: Microglia promote recruitment of NEPs to the EGL during cerebellar adaptive reprogramming after injury.

(A) Quantification of IBA1+ cell density in the WM at P8 in control or *mCAT* mutant nonIR and IR mice.

(B-E) Immunostaining of medial sagittal cerebellar sections at P5 showing expression of IBA1 (red) in mice treated with PLX5622 or control DMSO, with or without irradiation.

(F) Quantification of SOX2+ NEP cell density in the BgL at P5 in control or PLX treated nonIR and IR mice.

BgL, Bergmann glia Layer; WM, White Matter; P, postnatal day; nonIR, non-irradiated; IR, irradiated. Scale bar: 500  $\mu\text{m}$ . Data are represented as mean  $\pm$  SEM.

## Supplementary Tables

| Antigen  | Species | Concentration | References   | Source                       |
|----------|---------|---------------|--------------|------------------------------|
| Catalase | Rabbit  | 1 to 100      | 01-05-030000 | Athens Research & Technology |
| GFAP     | Chicken | 1 to 500      | ab4674       | Abcam                        |
| GFP      | Rat     | 1 to 1000     | 440484       | Nacalai Tesque               |
| IBA1     | Rabbit  | 1 to 500      | 019-19741    | Wako Chemicals               |
| SOX2     | Goat    | 1 to 500      | AF2018       | R&D System                   |

**Table S1:** List of antibodies and related information.

**Table S2.** Marker genes expressed by cluster in scRNA-seq dataset (irradiated at P1 (IR; P2, P3, P5) or non-irradiated (nonIR; P1, P2, P3, P5). pct1: % cells in a cluster that express the gene; pct2: % cells that express the gene outside the given cluster.

**Table S3.** Pseudobulk differential expression analysis between nonIR and IR gliogenic-NEPs (*Hopx*<sup>+</sup>, clusters 2, 3, 6, 10), neurogenic-NEPs (*Ascl1*<sup>+</sup>, clusters 5, 8, 11) and GCPs (*Atoh1*<sup>+</sup>, clusters 1,4,7,12,14) at P2, or at P3 and P5 (P3+5).

**Table S4.** GO Term analyses of differentially expressed genes (Table S3) of nonIR and IR gliogenic-NEPs (*Hopx*<sup>+</sup>, clusters 2, 3, 6, 10), neurogenic-NEPs (*Ascl1*<sup>+</sup>, clusters 5, 8, 11) and GCPs (*Atoh1*<sup>+</sup>, clusters 1,4,7,12,14) at P2, or at P3 and P5 (P3+5).

**Table S5.** Differentially open peaks at P2 identified by bulk ATAC-seq from nonIR and IR NEPs.

**Table S6.** Motif analysis of regions with increased accessibility in IR NEPs compared to the nonIR at P2.
